# Supplementary material for: Limitations of Phylogenomic Data Can Drive Inferred Speciation Rate Shifts
Source: PubMed Central journal article supplement — Mol Biol Evol. 2022 Feb 15;39(3):msac038. doi: 10.1093/molbev/msac038 (PMC8896619; doi:10.1093/molbev/msac038), 2022-02-15
Supplement: msac038_supplementary_data.pdf [file msac038_supplementary_data.pdf]

**Limitations of phylogenomic data can drive inferred speciation rate shifts**

***Supplementary Material***

Jack M. Craig<sup>1,2,3</sup>, Sudhir Kumar<sup>1,2,3,4,\*</sup>, and S. Blair Hedges<sup>1,2,3,\*</sup>

<sup>1</sup>Center for Biodiversity, Temple University, Philadelphia, United States

<sup>2</sup>Institute for Genomics and Evolutionary Medicine, Temple University, Philadelphia, United States

<sup>3</sup>Department of Biology, Temple University, Philadelphia, United States

<sup>4</sup>Center of Excellence in Genomic Medicine Research, King Abdulaziz University, Jeddah, Saudi Arabia.

\*Corresponding authors

**Email:** s.kumar@temple.edu, sbh@temple.edu

**Table S1.** Summary statistics from TESS and TreePar analyses of site-poor and site-rich timetrees of suboscine birds.

|                                              | Site-poor pruned | Site-rich pruned | Site-rich full |
|----------------------------------------------|------------------|------------------|----------------|
| Species fraction ( $\rho$ )                  | 0.60             | 0.60             | 1.00           |
| <b>TESS (Bayesian)</b>                       |                  |                  |                |
| Rate shifts of $2 \times \ln(\text{BF}) > 6$ | 0                | 1                | 1              |
| Speciation rate hyperprior shape             | normal           | normal           | normal         |
| Speciation rate hyperprior mean              | 0.16             | 0.18             | 0.25           |
| Speciation rate hyperprior SD                | 0.03             | 0.02             | 0.03           |
| Extinction rate hyperprior shape             | normal           | lognormal        | normal         |
| Extinction rate hyperprior mean*             | 0.02             | -6.17            | 0.07           |
| Extinction rate hyperprior SD*               | 0.04             | 1.40             | 0.05           |
| <b>Best TreePar (ML) Model</b>               |                  |                  |                |
| Number of rate shifts                        | 1                | 1                | 1              |
| Speciation rate ( $\lambda$ )                | 0.12             | 0.13             | 0.23           |
| Extinction rate ( $\mu$ )                    | 0.00             | 0.00             | 0.03           |
| Diversification rate                         | 0.12             | 0.13             | 0.19           |
| Turnover rate ( $\epsilon$ )                 | 0.00             | 0.00             | 0.15           |

**Note:** Species fractions ( $\rho$ ) are estimated based on the information provided in Jetz et al. (2012) and Harvey et al. (2020). Asterisks (\*) mark means and standard deviations (SD) generated from log-transformed distributions. BF: Bayes Factor (Jeffreys 1961; Kass and Raftery 1995; Lakens et al. 2020) at a threshold of  $2 \times \ln(\text{BF}) > 6$ , following the recommended settings in the TESS documentation (Höhna et al. 2016) Given that a Bayes factor of  $2 \times \ln(\text{BF}) > 3$  is generally a more stringent cutoff than a traditional p-value of 0.05, comparable to a p-value of 0.01, the confidence threshold we use here is more strict than that commonly used in conventional hypothesis testing (Jeon and De Boeck 2017). We defined unique rate shifts as a spike above  $2 \times \ln(\text{BF}) = 6$  preceded and typically followed by a return to baseline, not by a continued increase.

**References**

- Harvey MG, Bravo GA, Claramunt S, Cuervo AM, Derryberry GE, Battilana J, Seeholzer GF, Shearer McKay J, O'Meara BC, Faircloth BC, et al. 2020. The evolution of a tropical biodiversity hotspot. *Science (80-. )*. 370:1343–1348.
- Höhna S, May MR, Moore BR. 2016. TESS: An R package for efficiently simulating phylogenetic trees and performing Bayesian inference of lineage diversification rates. *Bioinformatics* 32:789–791.
- Jeffreys H. 1961. *Theory of Probability*. Third. Oxford, UK: Oxford University Press
- Jeon M, De Boeck P. 2017. Decision qualities of Bayes factor and p value-based hypothesis testing. *Psychol. Methods* 22:340–360.
- Jetz W, Thomas GH, Joy JB, Hartmann K, Mooers AO. 2012. The global diversity of birds in space and time. *Nature* 491:444–448.
- Kass RE, Raftery AE. 1995. Bayes factors. *J. Am. Stat. Assoc.* 90:773–795.
- Lakens D, McLatchie N, Isager PM, Scheel AM, Dienes Z. 2020. Improving Inferences about Null Effects with Bayes Factors and Equivalence Tests. *Journals Gerontol. Ser. B Psychol. Sci. Soc. Sci.* 75:45–57.
